# Supplementary material for: Endogenous hydrogen peroxide positively regulates secretion of a gut-derived peptide in neuroendocrine potentiation of the oxidative stress response in Caenorhabditis elegans
Source: eLife. 2024 Dec 5;13:RP97503. doi: 10.7554/eLife.97503 (PMC11620748; doi:10.7554/eLife.97503)
Supplement: Figure 1—figure supplement 1—source data 1. [file elife-97503-fig1-figsupp1-data1.xlsx]

## Sheet: Sheet1
AIY FLP-1::Venus secretion
wild type	wild type+juglone	aex-1/UNC13+juglone	aex-3/MADD+juglone	aex-4/SNAP25b+juglone	aex-6/Rab27+juglone
148.384	130.765	44.504	73.868	66.763	153.826
59.138	89.084	102.484	120.389	175.224	80.968
58.092	79.298	259.142	213.285	66.599	112.498
61.146	229.623	223.625	85.687	232.387	119.371
159.09	211.958	62.299	33.766	109.925	199.555
106.715	305.093	72.661	215.997	109.353	88.314
92.612	232.115	93.489	214.538	77.06	71.611
140	212.839	14.093	34.801	132.911	82.866
164.959	210.061	209.32	148.92	29.73	34.78
140.846	288.795	53.054	46.968	251.216	99.561
105.996	233.684	33.946	166.11	71.463	64.571
111.953	239.798	187.998	130.203	153.312	19.32
59.579	190.853	198.416	76.94	109.609	60.762
45.476	227.749	143.016	133.63	228.472	105.251
98.9	208.182	133.882	138.97	67.553	55.184
64.297	170.242	21.731	146.205	72.047	47.478
124.69	138.348	57.198	79.967	96.655	142.878
91.249	252.984	83.94	95.143	117.829	142.055
89.906	202.312	73.221	100.335	86.224	42.197
137.623	219.061	73.503	134.168	97.4	68.383
90.305	160.844	38.379	88.259	188.895	97.916
133.525	282.828	63.478	134.548	67.535	34.791
144.409	162.441	35.026	68.494	173.984	52.96
103.895	120.86	214.564	42.593	96.578	44.174
105.881	76.932	99.534	236.636	118.326	288.951
112.873	73.058	106.028	71.624	131.763	74.173
62.244	81.336	48.487	54.341	87.451	120.095
60.414	108.731	75.944	87.361	128.083	58.718
56.459	252.362	78.934	59.233	135.329	28.252
69.347	291.915		125.435	50.418	36.139
AIY FLP-1::Venus secretion
wild type	wild type+juglone	nlp-40	nlp-40+juglone	aex-2/GPCR	aex-2+juglone
107.784	191.789	68.823	72.752	35.285	153.89
85.071	150.539	44.997	194.609	92.946	310.473
98.961	137.077	103.044	261.415	48.071	75.827
73.149	174.8	147.862	184.178	61.452	202.507
76.408	226.498	57.971	211.789	50.367	163.715
173.918	267.29	207.127	270.134	93.77	194.874
41.287	92.089	155.627	245.641	130.694	113.499
73.537	201.403	130.927	233.41	111.653	422.732
112.037	171.528	133.155	125.636	88.854	162.583
100.906	157.434	58.852	94.295	74.675	246.127
135.793	222.165	88.328	249.127	38.574	205.512
36.57	193.915	64.871	285.645	95.276	255.894
169.253	226.486	113.289	149.128	71.605	167.163
75.503	234.231	99.195	132.394	153.556	249.729
79.429	285.058	77.656	146.285	33.11	212.813
136.675	182.659	93.962	162.402	104.859	151.116
111.486	145.264	119.906	246.63	126.498	127.86
88.475	101.293	63.087	248.047	133.223	103.232
137.532	260.43	134.01	129.488	195.426	140.938
96.037	89.533	115.721	85.285	106.994	142.23
66.191	152.456	64.133	85.646	53.002	131.257
130.727	126.061	48.022	339.739	68.143	276.583
93.7	74.587	91.388	252.09	121.835	171.246
99.57	231.128	67.02	210.184	114.446	127.591
		38.93	162.066	73.79	210.258
				57.386	32.227
				126.544	181.463
				39.501	88.739
				148.595	104.237
				169.289	40.415
juglone toxicity
M9	DMSO
100	100
97.297	100
100	100
AIY FLP-1::Venus secretion
M9	DMSO	juglone
61.779	164.223	161.924
39.34	34.091	147.008
123.483	109.962	175.354
136.734	46.192	307.566
154.33	21.729	83.622
81.69	71.281	111.268
60.189	72.311	132.167
261.295	36.364	173.096
26.316	83.936	196.593
47.925	33.073	216.613
51.337	137.177	161.34
141.159	40.964	162.458
79.245	38.56	176.897
87.152	23.473	281.847
104.997	55.649	149.386
137.023	119.504	147.448
193.938	128.374	104.196
69.857	67.341	210.647
45.495	77.823	197.16
96.716	212.158
