# Supplementary material for: Endogenous hydrogen peroxide positively regulates secretion of a gut-derived peptide in neuroendocrine potentiation of the oxidative stress response in Caenorhabditis elegans
Source: eLife. 2024 Dec 5;13:RP97503. doi: 10.7554/eLife.97503 (PMC11620748; doi:10.7554/eLife.97503)
Supplement: Figure 1—source data 1. [file elife-97503-fig1-data1.xlsx]

## Sheet: Sheet1
AIY FLP-1::Venus secretion
wild type	wild type+juglone	aex-5/PCSK5	aex-5+juglone	neuronal aex-5;aex-5+juglone	intestinal aex-5; aex-5+juglone	intestinal aex-5; aex-5; flp-2+juglone
148.384	130.765	63.28	98.332	88.514	311.407	203.84
59.138	89.084	149.43	70.485	138.062	294.852	112.413
58.092	79.298	36.896	93.276	15.291	247.86	129.751
61.146	229.623	105.107	184.95	51.822	239.413	77.221
159.09	211.958	45.745	106.546	30.209	160.947	47.313
106.715	305.093	90.86	97.11	418.283	179.501	179.805
92.612	232.115	53.635	128.619	72.758	142.479	152.743
140	212.839	190.308	91.286	72.126	174.865	83.132
164.959	210.061	83.705	93.805	31.999	166.854	103.879
140.846	288.795	208.031	91.145	167.411	197.4	140.334
105.996	233.684	82.119	115.422	26.423	148.842	134.29
111.953	239.798	60.279	102.705	116.688	138.877	112.513
59.579	190.853	106.349	106.651	88.081	172.81	71.249
45.476	227.749	97.585	128.343	87.546	331.461	49.187
98.9	208.182	36.583	34.839	86.18	80.666	176.916
64.297	170.242	118.325	55.11	106.904	94.218	167.441
124.69	138.348	101.626	36.036	57.879	76.685	87.32
91.249	252.984	165.822	42.028	62.794	297.677	101.02
89.906	202.312	167.839	97.703	59.356	441.538	92.833
137.623	219.061	33.956	186.185	66.532	252.811	123.645
90.305	160.844	109.169	185.549	106.34	237.451	124.41
133.525	282.828	32.053	41.256	72.319	123.796	82.958
144.409	162.441	73.729	189.35	61.974	248.183	153.009
103.895	120.86	105.478	159.068	131.785	163.196	222.026
105.881	76.932		77.295	127.512	96.446	113.606
112.873	73.058		100.196	121.759	91.258	124.912
62.244	81.336		121.541		59.126	101.163
60.414	108.731		77.929		122.213	109.144
56.459	252.362		44.83		188.081	29.088
69.347	291.915		88.236		202.978	38.231
juglone toxicity
wild type	flp-1	flp-2	flp-1;flp-2
96.962	55.065	70.338	58.166
98.716	68.478	58.803	79.656
104.322	80.119	67.533	65.359
AIY FLP-1::Venus secretion
wild type	flp-2	wild type+juglone	flp-2+juglone	intestinal flp-2;flp-2+juglone	neuronal flp-2;flp-2+juglone	intestinal flp-2(OE)	intestinal flp-2(OE)+juglone
78.438	59.147	282.047	128.63	263.986	188.561	103.506	182.754
60.608	72.332	290.552	113.874	171.252	122.323	114.024	174.959
31.864	133.854	229.231	92.371	228.084	162.917	220.906	564.46
76.325	125.968	192.305	94.367	182.618	130.441	153.999	160.573
110.412	97.464	267.236	136.927	179.132	127.951	96.649	147.918
117.764	83.139	179.576	137.958	227.977	57.752	79.132	350.296
38.906	154.542	73.634	26.411	152.358	73.798	154.759	288.441
25.163	130.465	102.737	120.086	145.279	103.771	93.345	275.646
122.498	78.705	243.834	82.223	241.327	172.376	182.266	417.659
37.593	125.993	250.875	60.274	165.381	118.129	98.838	348.898
175.815	134.502	180.201	125.581	215.033	153.595	220.336	241.16
136.757	127.359	152.834	100.49	348.877	249.198	258.724	111.155
55.401	68.414	201.2	102.323	373.143	266.531	56.174	579.681
89.785	28.52	207.282	123.037	112.55	80.393	113.631	473.411
221.655	221.198	136.695	101.415	122.875	87.768	105.939	289.784
174.901	107.07	286.248	111.665	280.809	200.578	96.728	396.666
94.783	52.598	382.979	265.664	217.555	85.337	103.557	310.845
79.262	59.81	247.76	96.464	109.937	113.556	119.895	441.303
88.345	111.521	278.777	182.579	280.381	200.272	98.966	477.171
89.443	57.5	180.641	125.07	210.403	150.288	65.064	114.29
135.746	120.353	152.078	29.357	238.171	170.122	96.563	147.143
91.307	144.294	83.978	197.12	132.735	94.811	42.958	412.32
210.075	96.769	69.91	89.376	106.548	76.106	58.579	349.778
90.253	90.062	477.848	46.981	155.672	111.195	154.616	197.147
66.901		289.522	61.805	228.159	57.882	195.178	283.747
		66.199				53.366	343.5
		135.112				79.592	452.145
		266.907				191.399
		143.231				139.402
		117.947				93.665
AIY axonal matrix-HyPer7
wild type	wild type+juglone	flp-2	flp-2+juglone
0.437	3.336	1.452	1.213
0.929	1.436	0.962	4.945
0.571	0.698	0.998	3.043
1.524	1.471	0.274	0.807
0.986	2.749	0.613	2.531
1.663	2.19	1.487	0.868
1.195	4.481	1.511	3.029
0.366	2.245	0.554	2.169
0.923	1.795	1.19	3.16
0.978	0.651	1.979	2.264
0.72	1.145	0.501	2.31
1.364	1.889	0.717	1.971
1.427	1.346	1.066	0.941
0.503	2.051	1.681	1.229
0.62	2.244	0.421	1.534
1.711	1.893	1.982	0.994
1.474	1.949	0.973	2.049
1.135	2.359	1.097	2.099
0.838	1.294	0.997	2.297
0.154	1.96	0.785	2.592
0.549	2.093	0.475	2.483
1.265	1.504	0.386	1.147
1.056		0.517	1.849
1.614		0.519	3.382
		0.181
intestinal Pgst-4::gfp expression
wild type	wild type+juglone	flp-1	flp-1+juglone	flp-2	flp-2+juglone	flp-1;flp-2	flp-1;flp-2+juglone
68.271	515.881	98.373	658.88	41.852	120.057	101.185	820.209
103.333	230.945	125.463	535.09	57.642	634.783	237.494	49.797
70.8	569.819	127.095	878.17	44.757	219.965	56.347	543.233
67.193	296.719	73.6	585.678	100.108	464.549	160.836	38.168
60.314	1056.52	159.079	193.797	96.904	311.574	121.032	182.084
91.544	582.802	84.294	756.088	78.886	155.699	64.102	252.972
152.814	1064.87	72.831	318.311	100.941	332.003	71.975	584.58
70.946	696.707	112.496	641.221	66.02	476.22	132.528	109.744
110.493	1090.82	34.96	130.357	81.008	390.821	88.833	616.303
49.462	907.593	82.099	70.095	45.48	375.579	54.305	260.48
75.651	487.79	47.701	422.455	116.158	201.056	63.373	269.713
97.069	696.556	114.981	67.387	87.576	440.886	139.293	948.273
114.413	154.253	145.58	210.44	72.308	512.383	96.784	489.485
36.269	781.398	171.993	217.573	118.687	195.887	74.382	279.057
76.2	971.107	156.108	311.557	152.819	211.003	188.722	245.288
95.603	590.072	97.354	181.281	137.066	193.64	80.763	244.336
61.596	542.086	58.589	166.436	136.656	641.685	94.616	772.312
86.515	774.315	125.949	749.32	101.102	466.94	194.564	106.295
149.533	759.275	69.633	489.071	76.844	493.474	104.467	912.035
101.687	746.04	98.019	101.94	62.295	323.505	144.796	383.872
109.03	1033.81	76.264	565.932	51.437	320.297	217.683	230.21
153.681	926.288	107.288	701.704	107.346	483.973	75.266	119.878
163.844	912.979	90.424	1155.93	160.69	560.171	129.824	43.605
182.571	574.683	89.887	344.596	199.026	335.063	103.028	1130.89
151.171	342.779	97.85	174.625	82.282	377.397	112.115	848.837
	362.384
intestinal Pgst-4::gfp expression
wild type	wild type+juglone	intestinal flp-2(OE)	intestinal flp-2(OE)+juglone	intestinal flp-2(OE);flp-1+juglone	flp-1+juglone
130.774	305.764	114.995	541.423	353.678	559.978
112.321	722.283	49.308	844.997	420.054	480.579
61.168	612.149	349.965	966.347	561.42	251.706
60.753	272.224	40.763	373.557	303.177	184.205
131.739	342.129	149.535	605.359	277.39	338.06
54.26	841.678	151.035	742.163	1035.66	514.863
110.098	663.852	53.668	466.558	235.863	389.001
105.756	439.143	46.259	846.226	494.742	275.254
54.215	814.122	47.785	479.001	310.892	619.799
86.576	553.585	131.479	842.324	537	134.71
31.896	517.795	350.879	896.217	353.508	245.529
103.621	479.085	68.809	907.626	277.793	90.702
78.682	273.636	87.145	849.486	112.146	361.312
177.978	600.726	96.35	663.852	156.485	260.385
77.036	384.565	61.752	439.143	717.818	532.913
163.088	371.468	158.485	814.122	245.9	287.145
111.872	588.97	52.782	553.585	219.489	458.076
88.744	360.657	149.468	896.2	338.16	240.976
58.705	318.918	181.53	670.275	393.996	342.171
79.974	492.12	68.289	1005.17	591.382	168.52
156.464	298.908	105.704	1041.95	164.937	190.696
159.908	714.584	60.476	878.393	243.109	253.709
104.372	603.79	175.255	493.934	504.892	408.455
	265.078	127.293	1009.06	318.81	370.719
	332.55	45.791	622.26		312.209
			917.746
