# Supplementary material for: Endogenous hydrogen peroxide positively regulates secretion of a gut-derived peptide in neuroendocrine potentiation of the oxidative stress response in Caenorhabditis elegans
Source: eLife. 2024 Dec 5;13:RP97503. doi: 10.7554/eLife.97503 (PMC11620748; doi:10.7554/eLife.97503)
Supplement: Figure 2—figure supplement 1—source data 1. [file elife-97503-fig2-figsupp1-data1.xlsx]

## Sheet: Sheet1
mCherry in coelomocytes
wild type	wild type+juglone
114.147	136.165
94.241	104.273
135.127	131.228
97.738	131.177
96.641	54.349
140.413	147.986
90.601	59.196
115.886	8.226
113.127	45.84
104.444	31.378
18.251	109.825
74.084	110.08
132.469	52.55
97.95	153.179
170.144	53.672
61.062	140.648
40.289	84.995
106.793	141.823
84.716	106.518
149.867
151.031
11.357
99.622
intestinal NLP-40::Venus secretion
wild type	wild type+juglone
185.923	72.211
262.891	54.474
21.66	167.017
67.068	77.718
39.113	67.008
33.214	43.946
198.995	59.271
343.282	136.786
52.384	33.782
222.184	18.377
66.286	49.949
22.52	326.101
20.515	41.52
89.199	13.299
73.713	178.784
147.586	199.531
81.882	119.846
75.616	213.692
49.33	235.69
62.384	193.965
188.509	76.875
123.749	156.697
25.244	266.538
32.132	24.67
14.621
intestinal NLP-27::Venus secretion
wild type	wild type+juglone
48.706	36.328
68.666	103.964
55.333	93.423
64.097	57.18
40.518	91.905
60.171	56.981
110.802	103.685
89.853	301.308
70.427	46.135
74.341	92.579
80.978	102.654
83.104	139.402
162.103	130.455
54.682	220.428
136.372	91.148
85.512	89.995
94.682	131.27
100.149	67.526
90.298	100.871
67.104	66.585
82.262	77.345
51.02	30.503
528.818	269.068
	86.543
	76.843
intestinal FLP-2::Venus secretion
M9	DMSO	juglone
61.398	90.157	152.011
129.259	32.991	358.51
109.474	61.469	72.096
128.245	34.345	154.889
10.667	99.701	92.313
147.868	82.741	229.728
60.884	168.242	125.803
199.062	64.726	172.562
204.957	137.099	233.911
37.509	99.724	113.29
111.496	229.365	270.939
176.183	81.37	159.204
61.083	145.061	191.85
71.398	111.786	154.269
51.564	264.947	419.618
73.652	68.877	230.345
83.806	35.504	143.616
48.846	421.422	144.157
164.576	137.794	295.89
68.071	27.15
