# Supplementary material for: Endogenous hydrogen peroxide positively regulates secretion of a gut-derived peptide in neuroendocrine potentiation of the oxidative stress response in Caenorhabditis elegans
Source: eLife. 2024 Dec 5;13:RP97503. doi: 10.7554/eLife.97503 (PMC11620748; doi:10.7554/eLife.97503)
Supplement: Figure 2—source data 1. [file elife-97503-fig2-data1.xlsx]

## Sheet: Sheet1
intestinal FLP-2::Venus secretion
wild type	wild type+juglone	aex-4/SNAP25b	intestinal aex-4;aex-4	aex-4+juglone	aex-6/Rab27	aex-6+juglone
57.733	160.056	65.6	246.611	145.359	125.645	59.516
80.501	168.082	108.84	11.807	110.103	168.127	182.275
21.553	79.533	107.434	48.357	42.683	58.35	56.912
108.284	172.078	53.264	291.027	96.065	93.395	31.083
84.761	248.095	11.391	139.341	97.65	193.319	31.328
180.18	247.78	13.674	180.786	71.386	22.106	77.543
116.024	257.824	10.454	337.2	122.059	11.386	238.717
44.045	39.652	39.009	185.202	80.726	28.763	42.921
88.128	166.227	31.594	51.64	101	189.619	42.553
119.178	113.081	66.561	150.326	32.027	20.017	66.307
63.915	125.591	113.757	220.809	29.33	164.701	88.7
173.187	129.543	67.245	317.417	105.645	62.588	26.315
229.983	254.322	111.472	273.762	47.912	36.852	53.905
43.793	272.982	57.771	365.314	66.162	191.706	100.78
74.447	180	43.618	73.602	29.461	99.393	85.096
201.315	280.439	31.394	199.649	80.508	85.475	37.939
24.752	331.739	26.11	405.597	46.135	29.505	58.478
81.839	406.731	46.767	89.647	137.706	35.598	42.209
92.586	379.931	57.962	239.128	27.579	35.195	39.413
74.57	75.199	145.402	193.774	100.551	36.932	160.708
202.082	196.435	29.897	43.296	83.013	81.2	477.382
37.145	130.352	66.265	281.619	35.081	21.024	33.126
	98.69	61.989	62.975	79.776	44.173	59.608
	110.454	43.147	20.533		44.624	168.437
	122.049	14.389				206.526
		58.495				87.598
						185.086
						76.258
						47.017
						195.338
intestinal FLP-2::Venus secretion
M9	300μM thimerosal	400uM paraquat	1mM sodium arsenite
64.527	153.837	108.516	71.908
166.828	156.582	170.579	128.857
76.373	242.042	174.484	165.013
162.016	89.86	110.255	104.279
174.312	80.624	317.263	205.534
52.056	210.015	207.366	60.218
121.273	189.688	288.02	96.917
201.118	330.917	131.103	253.102
127.376	254.66	101.442	237.948
82.874	95.121	177.637	125.98
60.831	229.601	123.283	60.999
84.618	113.362	288.532	311.539
39.586	176.958	238.345	192.69
72.47	198.836	365.574	45.795
116.509	233.17	211.147	143.571
219.639	177.436	127.083	215.518
71.762	66.649	118.719	133.017
94.358	234.671	86.248	35.926
94.532	104.345	140.414	87.969
35.145	115.103	170.959	34.811
83.257	51.74	108.464	124.677
59.38	155.77	117.393	136.22
39.157	281.635	106.563	49.269
	231.943	220.031	59.668
	284.173	139.059	46.372
intestinal FLP-2::Venus secretion
wild type	wild type+juglone	flp-1	flp-1+juglone
129.321	142.865	220.505	590.816
103.05	229.683	77.473	475.517
77.449	110.483	153.829	184.305
80.948	178.034	169.329	166.879
88.485	273.785	13.612	164.464
131.972	97.756	84.182	166.41
201.927	184.296	57.895	105.023
97.984	144.853	61.146	51.556
141.188	129.801	21.698	31.828
37.531	102.193	20.762	83.263
90.181	131.129	78.924	95.639
108.936	79.114	78.077	56.612
50.142	65.688	87.615	71.714
67.147	121.465	74.812	7.423
111.863	176.328	58.192	5.81
135.133	188.281	46.318	82.344
75.713	121.54	42.059	310.57
41.137	116.011	51.928	315.831
87.957	160.641	167.607	290.37
84.285	270.919	193.283	268.768
55.182	240.18	122.634	552.786
90.83	265.289	78.077	259.708
141.278	175.978	87.615	255.685
190.605	243.915	74.812	189.461
75.813	221.46	122.093	173.15
160.065	193.749	118.499	218.584
115.419	182.046	124.157	227.95
88.108	221.915	50.537	163.25
43.551	362.344	34.647	139.717
96.799	51.434	33.071	70.551
