# Supplementary material for: Endogenous hydrogen peroxide positively regulates secretion of a gut-derived peptide in neuroendocrine potentiation of the oxidative stress response in Caenorhabditis elegans
Source: eLife. 2024 Dec 5;13:RP97503. doi: 10.7554/eLife.97503 (PMC11620748; doi:10.7554/eLife.97503)
Supplement: Figure 3—figure supplement 1—source data 1. [file elife-97503-fig3-figsupp1-data1.xlsx]

## Sheet: Sheet1
intestinal FLP-2::Venus secretion
wild type	wild type+juglone	sod-1+juglone	sod-2+juglone	sod-3+juglone	sod-4+juglone	sod-5+juglone
64.663	247.514	62.663	101.887	134.266	82.912	261.404
158.641	202.345	121.653	78.287	93.387	119.227	228.968
67.202	124.16	216.41	132.866	217.986	245.826	200.016
63.536	427.439	140.295	157.313	80.628	524.597	68.532
170.508	296.261	74.621	112.468	225.424	177.097	144.84
154.478	173.586	31.669	270.57	102.072	365.538	102.407
161.635	309.366	47.182	243.26	76.946	260.621	110.434
109.231	115.307	250.709	319.007	108.328	179.346	290.419
120.863	262.45	79.024	229.579	36.409	191.462	225.265
88.197	170.024	91.582	325.548	73.504	275.898	254.616
85.91	196.515	58.431	187.38	130.503	133.052	213.004
195.791	148.954	271.344	91.787	28.443	126.24	544.769
89.485	198.324	120.411	232.73	135.555	292.1	504.425
129.286	297.453	64.244	172.199	174.543	141.004	208.371
105.994	211.114	111.702	71.222	140.166	409.388	175.935
108.44	155.393	253.246	108.708	143.275	210.098	146.984
47.21	129.531	74.902	247.589	179.846	161.878	410.23
91.75	425.008	18.536	220.28	28.517	164.219	400.258
54.827	73.777	190.609	160.518	32.25	159.559	336.058
61.912	68.88	217.866	206.599	147.894	294.697	315.607
33.591	227.546	53.244	296	98.242	252.264	288.042
61.794	126.633	96.085	157.833	81.365	260.292	233.199
41.435	273.275	143.012	333.257	71.127	383.388	164.157
140.928	257.08	23.493	205.876	190.009	318.234	185.449
47.509	204.988	125.234	305.613	194.204	347.585
123.19	111.639	29.925	104.478		305.973
88.385	100.969	98.978	387.48
117.23		44.161
116.378		117.107
mCherry in the intestine
wild type	wild type+H2O2
0.649498	0.855146
1.02822	0.984932
1.02045	0.844201
0.971621	0.641278
0.993251	0.854648
0.893777	2.20414
0.981879	0.997662
1.04949	0.97065
0.729415	1.02898
0.807367	0.727885
1.34744	0.916015
0.700735	1.08466
1.26361	0.467062
1.40831	0.507338
1.06445	1.2765
0.663088	0.548918
1.01281	1.23582
1.32311	1.79637
1.00467	1.07831
1.08683	1.04642
mCherry in the intestine
wild type	wild type+H2O2
0.872734	0.859581
0.601639	0.903719
1.9645	1.23398
0.242082	1.90475
0.389436	1.93499
1.93398	1.70279
0.920252	0.666325
0.502295	0.754516
1.11088	0.928508
0.993967	1.94186
1.4792	1.35965
1.51884	1.81342
0.903936	1.94393
1.56274	1.92943
0.524901	1.22615
1.35797	0.824165
0.45325	1.09143
1.44911	0.954094
0.875221	0.554849
0.343069	1.05567
	1.62315
	1.1951
