# Supplementary material for: Endogenous hydrogen peroxide positively regulates secretion of a gut-derived peptide in neuroendocrine potentiation of the oxidative stress response in Caenorhabditis elegans
Source: eLife. 2024 Dec 5;13:RP97503. doi: 10.7554/eLife.97503 (PMC11620748; doi:10.7554/eLife.97503)
Supplement: Figure 3—source data 1. [file elife-97503-fig3-data1.xlsx]

## Sheet: Sheet1
intestinal FLP-2::Venus secretion
wild type	wild type+juglone	sod-1/SOD1	sod-1+juglone	intestinal sod-1;sod-1+juglone
160.791	310.955	38.189	137.013	245.684
227.011	72.439	100.731	92.962	109.498
74.779	127.936	141.203	56.652	321.393
155.96	278.514	57.561	67.927	77.216
13.139	139.896	113.434	127.921	249.395
65.385	118.061	186.59	109.765	63.553
104.871	236.959	61.265	55.734	142.743
77.08	242.698	35.51	104.589	84.414
75.165	265.508	59.15	69.478	75.598
41.111	440.718	105.446	107.236	50.09
38.141	328.676	53.095	164.751	67.736
282.302	138.636	324.838	88.503	108.095
50.305	221.893	188.596	61.966	159.22
17.958	390.542	34.583	68.565	336.116
45.271	139.034	133.15	69.612	97.662
38.968	104.8	46.463	55.911	203.856
161.224	50.519	174.856	123.503	118.472
133.534	126.9	38.769	75.891	228.882
74.562	65.355	23.816	46.434	99.451
44.887	249.345	38.268	65.452	198.962
66.465	91.294	55.903	64.813	116.437
112.215	172.956	24.609	71.111	131.573
59.499		157.051	66.521	217.407
241.537		68.871	53.222	124.379
137.839				83.129
intestinal FLP-2::Venus secretion
wild type	wild type+juglone	sod-3/SOD2	sod-3+juglone	intestinal sod-3;sod-3+juglone	intestinal sod-3(ΔMLS);sod-3+juglone
166.335	83.375	81.067	174.059	279.025	128.694
140.073	194.024	84.97	59.467	196.867	101.909
92.016	100.439	198.34	67.618	238.169	61.475
171.21	380.387	73.361	182.209	325.666	149.572
88.805	256.841	205.108	88.685	314.774	184.174
62.69	164.146	92.873	229.65	206.418	89.578
137.534	214.766	70.012	125.151	276.926	113.292
82.183	114.347	98.565	105.406	176.103	127.918
51.102	217.973	33.127	130.187	232.315	81.841
145.622	155.939	66.879	104.116	217.483	35.056
94.458	190.541	118.741	161.342	237.665	233.842
218.039	127.511	25.879	76.07	305.43	138.684
53.824	98.793	123.338	165.346	147.258	35.363
114.335	251.541	117.713	199.983	97.31	83.282
152.424	192.111	127.533	236.302	222.859	106.074
101.223	129.106	89.264	257.433	253.7	233.763
80.573	115.206	163.637	135.53	156.765	148.726
47.301	406.262	25.947	98.863	261.964	143.487
57.348	74.407	29.344	80.219	146.064	68.113
60.695	74.752	134.565	51.013	259.723	81.672
37.307	228.827	89.387	101.101	140.583	78.873
64.146	333.468	74.032	96.937	83.821	132.487
30.552	211.251	64.717	103.419	126.846	91.601
68.759	219.549	172.885	119.763	96.595	211.276
181.446	202.34	176.701	70.767	272.499	61.973
intestinal FLP-2::Venus secretion
wild type	wild type+juglone	sod-1;sod-3	sod-1;sod-3+juglone
181.519	85.911	137.774	143.618
89.708	109.229	53.739	38.162
47.174	187.453	45.563	57.673
110.056	176.738	52.318	74.046
118.179	152.235	44.458	70.081
229.321	109.561	46.861	89.734
65.827	99.973	58.836	64.154
147.995	101.841	57.11	32.079
44.995	197.734	57.85	52.811
43.932	309.677	71.602	238.599
67.969	109.456	60.323	64.806
165.213	214.314	61.573	111.119
68.224	160.593	69.609	91.45
50.518	178.396	59.447	83.09
82.955	220.146	51.661	73.277
58.783	176.368	41.6	156.124
113.313	174.442	86.309	131.111
78.292	119.357	83.007	62.357
131.462	123.429	76.115	58.265
58.027	164.868	171.262	53.559
71.575	234.442	181.757	96.407
44.131	346.61	110.627	76.662
177.686	270.092		104.064
128.015	161.394		88.874
125.131	378.725		125.276
intestinal FLP-2::Venus secretion
wild type	wild type+juglone	wild type+H2O2	aex-4	aex-4+H2O2	aex-6	aex-6+H2O2
68.942	413.751	164.238	29.242	19.844	125.645	72.145
124.008	170.684	325.429	73.595	36.143	168.127	68.526
101.52	217.667	432.556	53.916	125.11	58.35	55.304
91.317	46.378	426.348	31.197	40.035	93.395	68.03
88.414	101.499	251.46	47.255	82.05	193.319	215.893
40.306	178.155	279.057	80.668	45.755	22.106	122.974
40.907	201.7	312.356	38.84	68.527	11.386	173.217
126.402	370.387	265.603	44.586	78.2	28.763	118.33
74.75	254.873	110.692	28.974	46.508	189.619	124.562
119.242	388.842	165.851	35.021	47.646	20.017	46.827
78.674	211.704	240.982	74.415	45.074	164.701	145.214
162.958	44.499	285.518	52.805	119.87	62.588	58.553
44.011	403.477	347.657	38.943	127.843	36.852	163.826
72.319	337.934	227.462	30.736	34.182	191.706	128.693
49.765	210.232	215.575	38.432	39.147	99.393	49.224
201.45	171.773	125.467	71.427	37.726	85.475	125.515
217.831	192.514	387.875	35.204	61.229	29.505	100.63
231.48	423.562	309.541	54.766	103.981	35.598	76.684
32.195	124.865	378.477	70.243	60.554	35.195	119.215
52.303	64.779	128.226	41.195	43.216	36.932	111.358
128.368	141.464	289.418	33.227	145.627	81.2	152.307
82.483	209.318	229.326	72.17	32.026	21.024	105.676
121.378	407.274	457.883	39.016	32.78	44.173	45.989
85.582	130.983	135.673	29.602	63.255	44.624	135.906
80.617	400.927	200.252	41.385	102.456		154.689
79.834	117.047
44.632	104.164
131.706	99.937
126.608	398.862
	152.847
intestinal FLP-2::Venus secretion
wild type	wild type+H2O2	sod-1+H2O2	sod-3+H2O2	sod-1;sod-3+H2O2
123.36	138.659	77.231	78.605	146.295
109.707	274.746	141.499	194.18	193.962
53.35	365.188	96.361	82.605	93.215
121.787	359.947	384.295	195.547	383.688
107.72	212.297	405.282	114.637	360.559
71.023	235.595	153.026	114.313	136.973
102.102	263.708	94.501	283.191	64.281
123.824	224.237	167.396	152.496	244.634
183.559	93.453	207.131	174.232	205.358
112.657	140.02	239.678	124.049	143.182
54.25	203.451	152.23	236.149	242.205
59.092	241.05	196.051	127.924	299.786
134.37	293.512	142.571	81.914	62.182
128.246	192.036	117.884	208.004	261.966
104.531	222.622	201.325	163.389	204.311
30.578	105.927	139.169	337.4	60.329
148.217	83.739	149.795	398.853	130.275
186.56	261.332	186.116	141.225	368.773
127.153	319.531	189.907	201.052	286.652
30.801	108.256	234.185	247.321	290.904
69.918	244.343	258.418	240.723	179.447
80.691	193.61	276.728	136.207	154.538
36.506	183.464	172.448	79.76	122.107
	114.543	148.28	242.074	50.729
	47.201	97.431	171.663	264.156
intestinal matrix-HyPer7
wild type	wild type+juglone	sod-1/SOD1	sod-1+juglone	sod-3/SOD2	sod-3+juglone	sod-1;sod-3	sod-1;sod-3+juglone
1.03711	2.10322	1.46507	1.1151	1.29597	1.13839	0.886458	1.11385
1.04224	2.50116	1.39996	2.25317	0.926401	1.09177	1.08068	1.22992
0.906159	2.12228	0.831984	2.43638	1.64656	1.75707	0.940136	1.23279
1.44905	2.03381	1.15513	2.51436	1.18886	1.23518	0.905976	1.20186
0.884429	1.42942	0.994205	1.7551	1.10328	1.21563	1.09981	0.990149
0.692079	0.948124	0.817662	2.37013	1.14388	1.27379	1.08383	0.899643
1.06312	1.82806	1.03901	3.37359	1.74818	0.684627	1.12076	0.54665
1.07872	2.02262	1.46097	2.4346	0.658455	1.69057	1.25457	1.16474
1.34112	2.84917	1.15791	1.29676	0.884284	2.09845	0.85858	0.828227
0.795324	2.24465	0.98322	1.87576	1.41553	1.77928	1.17378	1.04359
1.41704	1.44964	0.680816	2.76042	0.808228	1.80046	1.24111	0.829284
1.46938	3.22885	1.17568	2.74837	0.994931	1.49285	1.09723	0.816482
0.796929	3.91367	1.47447	1.59646	1.36792	1.67533	1.32427	0.738233
0.777049	2.91712	1.10063	1.50978	1.08436	1.25097	0.807741	1.09965
0.532288	1.97114	1.17072	2.81133	0.670605	0.833711	0.827753	1.06129
0.870349	2.04757	1.27005	2.02884	0.34973	1.99332	0.728836	0.953264
1.17288	1.90737	1.19469	1.08063	1.55636	1.08721	0.973591	1.20828
0.945224	1.85993	0.896684	1.56313	1.04889	0.790162	0.878832	1.16986
0.713723	1.44491		2.30035	1.11716	1.27611	0.981623	1.26385
1.01578	1.6449		2.29031			0.748097	1.08843
intestinal OMM-HyPer7
wild type	wild type+juglone	sod-1	sod-1+juglone	sod-3	sod-3+juglone	sod-1;sod-3	sod-1;sod-3+juglone
0.468516	1.92803	1.65359	1.51401	1.85268	1.6268	0.873903	0.904991
0.909227	2.51432	0.341678	1.35311	1.42268	1.60327	1.04481	0.906759
1.02958	1.94549	1.64529	1.28776	1.08439	1.67117	1.00166	1.23824
1.43536	2.75039	0.809848	1.31217	0.788454	1.00641	1.27195	1.10284
1.48047	2.63935	1.08164	0.927633	1.05408	1.78039	1.06516	0.758749
0.792225	1.75515	1.0858	2.10778	1.04822	1.70277	0.76497	1.02844
1.29091	0.789789	1.01826	0.861119	0.855591	1.50398	0.858884	0.889545
1.2599	1.85414	1.1257	1.77308	0.932096	1.43815	1.47583	1.18186
1.12092	1.72584	1.13109	1.84046	1.36659	1.98147	1.27177	1.09864
0.704438	3.38668	1.27951	2.02314	1.0729	2.24805	1.29425	1.26843
1.17705	1.32889	1.45372	1.43153	0.509202	1.17854	1.07591	0.977032
1.11801	2.95989	1.14899	0.885832	0.906367	1.30342	0.728058	0.664535
1.09851	2.25867	0.597377	1.60922	0.731585	2.43524	1.15443	1.16759
0.590401	1.78813	0.477081	1.43443	0.714031	1.74377	0.9113	0.677609
0.88855	3.57895	1.34435	1.60013	1.09142	2.35967	0.965627	0.954125
1.26526	1.87701	1.03392	1.12061	0.950697	1.94272	1.06675	1.00177
0.436988	2.63449	0.456865	1.33576	0.991173	2.02347	0.788193	1.10108
1.07528	1.705	0.993053	1.76968	0.616918	2.2706	0.785519	0.757343
1.1616	3.09655	1.23024	0.957841	0.572911	1.10097	0.990607	0.965452
0.696793	1.50788	0	1.57897	0.476546	2.17644	1.03044	1.3424
