# Supplementary material for: Endogenous hydrogen peroxide positively regulates secretion of a gut-derived peptide in neuroendocrine potentiation of the oxidative stress response in Caenorhabditis elegans
Source: eLife. 2024 Dec 5;13:RP97503. doi: 10.7554/eLife.97503 (PMC11620748; doi:10.7554/eLife.97503)
Supplement: Figure 4—figure supplement 1—source data 1. [file elife-97503-fig4-figsupp1-data1.xlsx]

## Sheet: Sheet1
intestinal FLP-2::Venus secretion
wild type	prdx-3/PRDX3
98.852	135.154
45.401	75.613
58.336	36.137
53.211	42.57
89.991	57.878
24.388	21.588
63.767	69.633
118.797	104.54
92.297	156.141
57.114	230.578
7.578	99.757
66.043	117.341
364.786	63.131
142.148	24.555
96.705	17.587
90.575	22.029
255.057	96.496
156.216	37.824
151.841	64.939
13.181	209.858
11.125	79.076
55.076	21.793
50.824	142.797
44.781	44.087
99.731	109.208
110.993	93.027
99.444	56.319
119.552	55.852
184.353	222.185
177.838
intestinal FLP-2::Venus secretion
wild type	prdx-2	intestinal prdx-2a;prdx-2
71.709	63.383	177.924
46.336	515.095	512.722
48.886	130.285	144.918
79.336	603.106	307.817
84.165	507.405	212.06
79.034	502.718	418.875
38.711	177.697	203.307
58.969	223.876	158.025
53.799	203.389	547.675
43.3	129.633	368.218
63.961	494.464	103.502
166.216	481.755	488.729
89.291	247.657	254.659
207.503	148.048	126.083
192.051	309.138	153.029
160.826	479.48	515.209
61.046	328.364	510.235
170.04	424.906	176.484
60.739	259.154	143.029
226.935	281.2	115.24
115.85	472.164	307.191
158.402	250.75	310.444
148.27	376.49	316.37
104.854	219.619	297.266
104.631	509.501	348.233
82.608	117.055
63.65	364.633
74.769	461.625
54.937	117.634
89.177	294.587
intestinal FLP-2::Venus secretion
wild type	prdx-2	intestinal prdx-2c;prdx-2
100.441	151.509	122.587
75.06	153.198	306.515
76.776	129.248	214.122
195.542	304.125	89.663
141.919	251.531	112.522
142.816	256.644	60.775
128.269	220.345	82.327
62.191	262.402	370.674
54.217	112.249	101.498
79	114.507	411.579
65.653	352.144	423.913
72.939	330.781	126.003
69.473	149.066	124.882
139.233	137.434	247.488
100.295	155.147	91.139
92.653	114.947	99.601
106.868	343.052	89.69
92.91	295.8	89.651
76.181	224.117	225.111
109.51	231.697	325.984
87.267	269.573	53.111
77.245	239.529	140.698
94.006	266.995	88.881
149.106	215.296	212.92
110.429	99.79	91.721
intestinal FLP-2::Venus secretion
wild type	prdx-2b	prdx-2b;sod-3
100.519	255.077	89.503
183.426	150.047	63.645
120.114	106.22	386.451
81.834	325.563	29.917
165.038	214.866	42.219
113.8	434.121	41.315
83.637	233.366	37
116.552	298.854	346.145
89.256	182.989	78.62
75.364	116.911	70.443
37.629	290.203	208.1
225.679	54.412	36.323
34.228	439.99	97.781
155.057	249.307	71.157
72.318	151.999	55.053
45.172	170.18	200.832
74.815	238.069	186.302
154.433	350.252	78.726
88.858	275.419	127.997
80.007	236.351	101.712
55.668	171.138	33.374
114.717	264.69	112.59
100.203	189.454
68.751
62.924
