# Supplementary material for: Endogenous hydrogen peroxide positively regulates secretion of a gut-derived peptide in neuroendocrine potentiation of the oxidative stress response in Caenorhabditis elegans
Source: eLife. 2024 Dec 5;13:RP97503. doi: 10.7554/eLife.97503 (PMC11620748; doi:10.7554/eLife.97503)
Supplement: Figure 4—source data 1. [file elife-97503-fig4-data1.xlsx]

## Sheet: Sheet1
intestinal FLP-2::Venus secretion
wild type	wild type+juglone	prdx-2/PRDX2	prdx-2+juglone	intestinal prdx-2b;prdx-2	prdx-2b	trx-3/NXNL2	trx-3+juglone	intestinal trx-3;trx-3	trx-3;sod-1	trx-3;sod-3
100.441	307.568	151.509	290.44	116.713	242.302	490.702	383.678	53.252	73.847	104.29
75.06	237.826	153.198	87.187	26.863	130.157	251.485	306.788	47.022	40.267	387.034
76.776	233.716	129.248	271.713	128.213	89.092	98.103	241.762	56.668	65.547	268.291
195.542	246.121	304.125	209.062	72.45	318.048	243.5	62.436	126.796	81.72	160.983
141.919	232.43	251.531	83.058	51.76	147.67	244.64	453.816	48.102	47.215	365.284
142.816	155.54	256.644	206.012	79.897	416.366	200.212	223.878	234.579	52.851	100.112
128.269	118.093	220.345	347.027	41.016	152.705	56.291	263.943	274.325	203.44	111.984
62.191	97.023	262.402	148.422	70.658	115.65	128.557	151.627	262.053	41.707	228.785
54.217	115.135	112.249	399.254	51.828	59.905	137.289	159.323	110.313	55.395	161.349
79	106.146	114.507	34.182	146.323	253.684	231.606	96.847	65.54	70.186	118.491
65.653	98.047	352.144	292.325	159.641	247.633	630.102	134.908	46.13	18.621	138.581
72.939	107.602	330.781	154.484	24.636	327.892	526.435	216.195	169.545	82.144	287.514
69.473	374.923	149.066	219.306	223.367	190.059	121.513	455.004	72.958	101.442	210.858
139.233	214.565	137.434	133.042	40.941	147.019	478.701	249.094	52.579	142.904	304.889
100.295	391.915	155.147	190.761	87.302	304.871	367.296	248.972	173.319	70.337	331.767
92.653	240.332	114.947	237.322	121.351	41.053	164.646	159.868	120.084	65.773	172.104
106.868	226.38	343.052	227.59	58.308	198.472	195.823	221.098	78.116	70.135	307.307
92.91	203.749	295.8	157.72	51.65	126.792	196.557	133.429	53.357	51.422	136.545
76.181	193.153	224.117	95.487	76.583	258.284	284.024	258.004	117.537	34.442	246.007
109.51	595.647	231.697	185.752	65.715	113.488	133.152	183.288	158.122	246.637	186.54
87.267	276.786	269.573	227.423	176.73	67.034	364.273	164.809	200.684	58.933	314.866
77.245	233.002	239.529	300.214	95.05	213.738	265.532	191.206	211.316	25.344	113.341
94.006	244.66	266.995	163.242	89.611	77.24	216.683	264.334	176.58	39.206	91.606
149.106		215.296	95.709	105.462	91.837	166.249	46.779	126.709	99.391	143.656
110.429		99.79	256.823	91.721	135.611	35.393	116.653	120.328	176.648	417.356
intestinal matrix-HyPer7
wild type	wild type+juglone	prdx-2	prdx-2b	trx-3
1.03711	2.19894	3.00927	2.36151	0.797255
1.04224	1.29764	2.51104	2.47638	1.60862
0.906159	2.14585	1.79125	2.3548	1.36221
1.44905	1.53971	2.59904	2.42722	1.61812
0.884429	3.93491	2.57213	1.85914	0.82682
0.692079	1.68042	2.31171	1.88483	1.37485
1.06312	2.01848	2.71373	2.08369	0.827643
1.07872	1.83375	2.57077	1.96404	1.24356
1.34112	2.41823	2.49266	1.82635	1.01352
0.795324	2.00051	2.40871	2.38063	1.44716
1.41704	1.30479	2.7164	2.35783	1.49526
1.46938	2.06902	2.12245	3.32973	1.32829
0.796929	2.4756	2.76951	1.34704	1.17571
0.777049	2.08863	2.41119	2.64563	0.64068
0.532288	2.00518	2.41679	3.26173	0.84544
0.870349	3.02076	2.19938	1.40111	0.546718
1.17288	2.11259	2.14634	1.84938	0.445348
0.945224	2.69658	2.11266	2.25465	0.668874
0.713723	2.27167	1.83326	2.46949	0.629466
1.01578	3.10257	2.24246	1.59299	0.653787
intestinal OMM-HyPer7
wild type	wild type+juglone	prdx-2	prdx-2b	trx-3
0.468516	1.92803	2.85228	1.74329	2.00869
0.909227	2.51432	3.44288	1.90443	1.51747
1.02958	1.94549	3.54075	2.16004	1.85544
1.43536	2.75039	3.82372	1.70487	1.69629
1.48047	2.63935	1.99706	1.70163	1.21995
0.792225	1.75515	1.73978	2.21589	3.11246
1.29091	0.789789	1.91045	1.56533	1.01865
1.2599	1.85414	1.76118	1.69851	1.88222
1.12092	1.72584	2.27424	2.70706	1.43801
0.704438	3.38668	2.37532	3.25952	1.46953
1.17705	1.32889	2.77721	1.85451	1.95681
1.11801	2.95989	2.15489	1.50772	1.8322
1.09851	2.25867	1.85746	1.6938	2.25256
0.590401	1.78813	1.61777	2.10518	1.99321
0.88855	3.57895	1.79225	1.84637	1.75147
1.26526	1.87701	1.70521	1.68334	1.12907
0.436988	2.63449	2.18472	1.60379	1.8137
1.07528	1.705	2.15466	1.70426	1.5277
1.1616	3.09655	1.66054	1.96324	1.62205
0.696793	1.50788	1.67117	1.1399	2.09675
intestinal FLP-2::Venus secretion
empty vector	sod-1	sod-3
192.565	38.413	68.261
113.887	33.074	41.099
93.341	11.805	46.93
99.783	21.833	32.623
54.792	23.656	29.57
50.996	42.258	117.827
52.768	51.759	44.171
58.825	64.562	47.063
31.459	35.474	42.384
141.581	35.078	154.193
92.037	35.286	26.934
130.126	64.484	51.541
86.247	45.885	24.66
101.473	34.46	23.194
100.214	23.424	23.612
127.763	122.011	48.858
106.982	23.998	12.92
88.589	44.2	33.88
54.658	38.953	58.099
139.049	16.751	22.967
174.496	35.643	97.155
152.649	139.538	74.262
86.701	172.828	40.896
94.351		62.798
74.668
intestinal Pgst-4::gfp expression
wild type	prdx-2b	prdx-2b;flp-2
126.179	110.697	72.547
84.276	96.461	69.465
63.252	122.984	50.81
48.655	180.52	104.053
97.844	114.082	71.528
54.684	116.49	90.713
149.646	128.71	73.966
119.192	178.537	125.808
133.448	227.482	59.806
112.332	124.021	175.631
76.725	124.368	59.032
45.974	117.805	82.143
92.694	86.552	100.634
165.703	141.579	44.873
150.937	82.086	115.288
122.776	129.411	74.146
152.541	123.212	117.57
53.23	193.698	89.347
142.778	124.579	60.743
70.885	75.605	107.131
109.968	195.003	85.744
114.816	192.15	82.085
51.466	139.863	41.654
98.705	216.305	144.43
61.293	96.692	91.042
