# Supplementary material for: Endogenous hydrogen peroxide positively regulates secretion of a gut-derived peptide in neuroendocrine potentiation of the oxidative stress response in Caenorhabditis elegans
Source: eLife. 2024 Dec 5;13:RP97503. doi: 10.7554/eLife.97503 (PMC11620748; doi:10.7554/eLife.97503)
Supplement: Figure 5—figure supplement 1—source data 1. [file elife-97503-fig5-figsupp1-data1.xlsx]

## Sheet: Sheet1
intestinal FLP-2::Venus secretion
wild type	wild type+juglone	pkc-1/PKCε/η	pkc-1+juglone
78.219	74.593	75.393	90.451
193.313	76.374	150.324	67.789
99.866	185.746	72.619	65.539
80.611	162.645	57.471	87.432
88.677	306.304	205.161	65.317
52.175	357.606	46.652	199.034
66.008	25.942	263.271	172.457
88.352	229.515	85.033	184.258
144.299	176.356	192.913	141.031
278.47	92.858	58.786	348.902
133.674	148.526	79.704	263.705
81.682	258.608	202.317	422.449
134.029	64.781	122.27	406.422
77.26	211.887	44.37	316.194
186.235	91.528	238.741	285.361
188.61	392.24	68.16	25.942
81.96	262.359	35.897	270.656
69.321	308.989	133.106	188.373
57.442	60.443	44.885	251.208
37.222	149.691	36.298	101.504
32.459	79.46		92.858
36.265	123.355		132.185
39.898	117.944		164.866
73.954	258.082		315.825
	366.393		201.39
Exp per cycle
wild type	aex-4(sa22)	pkc-2(ok328)
1	0.1	0.9
1	0.2	1
1	0.1	1
