# Supplementary material for: Endogenous hydrogen peroxide positively regulates secretion of a gut-derived peptide in neuroendocrine potentiation of the oxidative stress response in Caenorhabditis elegans
Source: eLife. 2024 Dec 5;13:RP97503. doi: 10.7554/eLife.97503 (PMC11620748; doi:10.7554/eLife.97503)
Supplement: Figure 5—source data 1. [file elife-97503-fig5-data1.xlsx]

## Sheet: Sheet1
intestinal FLP-2::Venus secretion
wild type	wild type+juglone	pkc-2/PKCα/β	pkc-2+juglone	intestinal pkc-2;pkc-2+juglone	intestinal pkc-2(K375R);pkc-2+juglone
134.26	109.22	168.37	102.25	333.064	103.729
50	235.41	115.48	92.41	194.097	93.744
51.52	117.04	29.43	64.05	186.373	64.978
63.08	437.95	108.78	194.96	305.198	197.786
105.61	294.3	74	42.76	138.578	91.589
58.21	144.02	204.83	27	132.528	123.807
45.5	186.68	159.31	142.64	244.925	144.706
71.22	122.95	96.25	333.7	275.813	338.529
106.07	266.67	140.75	83.98	265.181	85.196
114.71	186.03	121.63	50.56	212.556	51.289
113.74	210.33	82.69	74.86	197.294	75.944
113.23	179.24	51.82	31.35	166.946	128.219
74.11	98.41	34.19	19.5	141.883	164.397
74.56	327.51	127.21	272.04	430.083	275.984
188.66	197.98	52.48	345.32	280.592	350.322
150.58	171.19	120.79	204.26	148.623	207.213
92.34	117.18	103.79	76.52	253.629	77.633
171.93	346.4	59.32	57.23	178.546	58.059
165.14	218.28	81.29	156.22	223.072	158.483
23.86	209.68	38.35	177.72	203.362	180.29
69.98	271.89	94.33	98.76	154.467	100.186
182.6	401.61	217.24	73.58	301.41	74.642
131.56	273.54	87.9	57.24	184.303	58.07
86.71	260.24		74.49	381.757	75.569
60.8	201.45		70.26	191.133	71.275
intestinal matrix-HyPer7
wild type	wild type+juglone	pkc-2	pkc-2+juglone
0.671072	2.42095	1.41163	1.8635
0.991525	1.97283	0.951255	1.99291
0.811573	2.10297	1.29963	2.56165
0.675532	1.90078	1.74536	1.07297
0.794318	1.46646	0.608339	1.058
1.05812	3.52477	1.1918	1.64553
0.982968	1.97373	1.11299	0.845391
1.60412	1.52319	0.710183	1.51579
1.43299	2.63232	1.10726	1.53618
0.904286	2.8105	0.929963	1.09249
1.08413	2.8076	1.05566	2.05711
1.15524	3.51006	0.649605	1.48882
0.693149	1.19947	1.42875	2.0303
0.590557	1.15788	1.9132	2.74541
0.810451	3.24095	0.997059	2.49933
0.798037	1.35836	0.769293	1.36556
1.20048	2.07421	1.21456	2.94078
1.04492	1.55811	0.830822	2.30817
1.1877	1.90087	0.808082	3.33899
1.50882	2.02716		2.26177
intestinal OMM-HyPer7
wild type	wild type+juglone	pkc-2	pkc-2+juglone
1.33104	1.78567	1.38384	3.30665
1.42485	3.05851	1.10396	1.7934
0.668163	2.04915	1.80166	2.31948
1.18794	1.48832	1.95796	1.68791
0.607524	2.79164	1.89944	1.85697
0.596589	3.18884	0.568354	1.49116
0.99714	1.64699	1.18613	1.96713
1.24931	1.71917	1.81359	1.74971
1.385	2.04656	0.892794	2.41291
0.905114	1.07289	1.03582	1.80356
1.26597	2.46592	1.10122	2.6039
1.57567	3.14894	0.931383	2.29081
1.02403	2.7809	1.53804	2.1029
0.645898	2.04375	1.0892	2.01036
0.635258	1.93666	0.835341	1.98814
0.615008	1.97969	0.748751	2.21922
1.11338	3.55571	0.576072	1.26349
0.95501	0.973036	0.788711	3.08364
0.735704	2.0886	1.18235	2.1199
1.08141	1.236	1.70562	1.33035
intestinal FLP-2::Venus secretion
wild type	wild type+H2O2	pkc-2+H2O2
138.631	155.498	43.038
114.249	272.137	176.219
51.346	345.506	193.458
112.087	348.681	78.56
97.527	229.921	112.228
45.707	223.527	39.794
88.321	279.709	36.759
143.11	219.554	62.821
195.47	116.603	94.94
115.464	152.561	33.187
73.444	221.095	34.141
45.549	235.388	87.583
141.314	322.509	39.564
155.329	203.587	62.123
107.039	230.798	107.835
74.191	106.225	97.884
162.465	102.348	113.732
153.95	257.227	91.71
104.338	297.674	24.015
36.825	122.164	162.446
41.186	268.099	81.67
51.998	183.535	59.113
50.458	191.007	72.932
	101.63	80.693
	53.015	95.016
intestinal FLP-2::Venus secretion
wild type	prdx-2	pkc-2	prdx-2;pkc-2
62.848	188.899	95.695	45.921
32.654	222.667	77.158	46.363
112.907	246.297	45.792	78.528
30.526	331.246	162.695	102.915
66.911	305.76	81.28	111.513
140.834	104.377	31.386	72.23
107.737	177.865	45.394	51.31
66.638	233.697	319.023	53.742
137.467	275.698	70.255	92.764
112.386	228.389	67.561	87.045
242.188	147.453	72.762	168.945
53.392	184.85	39.088	108.921
169.425	195.965	200.5	110.354
149.034	327.147	227.506	129.12
112.57	131.29	106.793	114.405
138.56	90.68	174.686	104.568
105.113	237.593	42.976	49.479
56.513	67.47	58.531	83.302
39.591	164.251	123.985	235.196
158.406	141.136	137.556	112.401
60.21	319.816	87.26	63.7
35.374	81.845	55.029	145.874
94.482	86.132	56.148	102.896
96.103	228.823	64.403	139.262
118.132	113.028	46.948	103.955
