# Supplementary material for: Endogenous hydrogen peroxide positively regulates secretion of a gut-derived peptide in neuroendocrine potentiation of the oxidative stress response in Caenorhabditis elegans
Source: eLife. 2024 Dec 5;13:RP97503. doi: 10.7554/eLife.97503 (PMC11620748; doi:10.7554/eLife.97503)
Supplement: Figure 6—figure supplement 1—source data 1. [file elife-97503-fig6-figsupp1-data1.xlsx]

## Sheet: Sheet1
intestinal FLP-2::Venus secretion
wild type	wild type+juglone	plc-2/PLCβ	plc-2+juglone
262.172	306.106	34.733	278.948
59.759	286.559	176.696	311.327
86.477	98.237	74.868	114.723
78.368	131.208	105.582	92.184
37.106	111.955	60.286	154.264
55.173	118.719	42.06	114.275
43.791	210.572	78.676	168.049
45.817	176.812	55.179	173.177
107.749	116.764	107.749	210.757
128.169	176.985	108.583	78.805
88.997	169.369	67.626	193.832
203.788	284.406	108.547	217.335
70.244	199.448	141.713	195.447
100.257	205.711	235.91	241.832
123.975	179.774	110.407	361.304
33.071	215.823	48.814	304.668
48.814	112.714	84.764	100.179
93.318	92.23	152.144	294.771
76.21	138.716	96.646	211.881
191.08	127.481	51.524	194.873
154.917	316.53	78.875	70.447
136.858	231.572	210.663	62.381
125.719	237.834	279.462	182.92
96.646	211.898		190.052
51.524	252.792		114.902
			182.919
			113.999
			114.902
