# Supplementary material for: Endogenous hydrogen peroxide positively regulates secretion of a gut-derived peptide in neuroendocrine potentiation of the oxidative stress response in Caenorhabditis elegans
Source: eLife. 2024 Dec 5;13:RP97503. doi: 10.7554/eLife.97503 (PMC11620748; doi:10.7554/eLife.97503)
Supplement: Figure 6—source data 1. [file elife-97503-fig6-data1.xlsx]

## Sheet: Sheet1
intestinal FLP-2::Venus secretion
wild type	wild type+juglone	egl-8/PLCβ	egl-8+juglone
140.701	253.674	64.871	65.825
322.247	228.831	34.29	21.141
48.697	324.123	76.42	314.744
213.336	268.56	70.495	93.975
26.488	155.855	111.756	33.802
96.394	56.578	189.953	48.272
51.533	60.662	73.632	18.38
93.343	238.602	41.809	26.267
36.837	219.476	173.301	88.585
97.197	298.495	57.914	422.606
99.221	110.067	67.554	80.328
55.138	207.789	117.817	23.494
53.373	209.151	102.787	26.683
281.071	214.091	124.717	209.323
147.921	173.475	41.846	133.965
57.759	99.11	217.55	46.953
81.703	90.538	74.717	123.344
155.116	57.768	105.266	24.57
85.091	236.989	54.776	75.201
42.383	131.209	43.591	55.969
71.999	309.372	108.49	123.751
53.701	107.59	58.501	26.483
50.489	98.539	63.232	70.855
82.1	224.538	30.695	31.087
56.161	224.343	57.981	44.114
intestinal matrix-HyPer7
wild type	wild type+juglone	egl-8	egl-8+juglone
1.01889	1.7302	0.792794	2.05838
0.988496	2.09109	0.915563	1.81202
1.02122	3.00947	0.924977	3.07092
1.06982	1.455	0.950675	2.0732
0.905081	1.49618	0.944799	1.4973
0.793044	1.95813	0.92345	2.02989
0.935975	1.08359	1.28848	0.817472
1.29817	1.52118	1.28827	1.25937
0.802279	2.02365	1.34724	1.81134
0.997927	1.07474	1.26871	1.15905
0.990266	2.61688	0.881559	2.54088
0.983715	1.00096	0.984684	2.0017
0.735536	1.71013	1.00562	1.66251
0.994484	2.66068	0.337248	3.03557
0.73042	2.60779	0.890988	2.31656
1.13629	2.56341	1.06111	1.40094
0.840623	1.43393	1.03992	2.68395
0.789203	2.40268	0.999692	2.54223
0.754787	3.47901	0.894878	3.27611
1.97354	3.14625	1.30088	2.2981
1.22618			1.07698
1.01404
intestinal OMM-HyPer7
wild type	wild type+juglone	egl-8	egl-8+juglone
0.808195	1.84664	0.783826	2.14741
0.829116	1.44104	1.58153	2.15927
0.85851	2.7021	1.33926	2.26896
0.938402	1.03027	1.59086	2.79457
0.295989	1.30605	0.812892	2.44613
1.27955	1.44104	1.35169	1.68291
1.27745	0.90985	0.813701	2.36623
1.50051	1.31279	1.22261	2.23662
1.23982	1.67445	0.996447	1.43347
1.2614	1.41673	1.42278	1.87652
1.149	2.32101	1.47007	1.63861
1.15324	0.956987	1.30592	2.20922
0.723373	1.7369	1.15591	2.43316
0.729153	2.74067	0.629887	1.99163
0.733138	2.05553	0.831198	2.11462
0.84717	1.42941	0.537509	2.12099
1.34222	2.44127	0.437846	2.0074
0.963446	2.38511	0.657606	2.4386
1.00993	3.00124	0.618863	2.29473
1.06038	2.19761	0.642774	3.33065
intestinal FLP-2::Venus secretion
wild type	dgk-2/DAGKε	dgk-2+juglone	intestinal dgk-2;dgk-2	dgk-2;pkc-2
104.228	86.956	66.847	86.868	48.688
115.677	334.119	89.65	126.209	78.785
62.219	195.101	53.918	89.013	129.43
102.369	201.094	60.213	100.419	58.219
83.089	324.346	162.469	55.766	101.909
37.226	311.878	433.171	117.847	155.251
80.611	235.147	168.255	53.956	28.972
176.865	76.714	178.533	111.809	148.073
217.442	91.727	67.439	79.811	41.738
58.414	59.621	431.513	89.975	92.13
74.244	208.905	71.462	60.938	46.807
84.005	88.735	208.783	122.007	38.394
80.031	302.007	268.605	309.504	52.193
178.253	359.207	100.113	231.179	67.684
123.305	110.914	80.304	117.779	331.917
43.112	68.706	103.58	195.595	75.29
46.901	127.271	427.621	132.036	82.448
189.986	321.443	446.561	94.421	35.845
67.892	97.707	514.024	175.261	42.143
129.05	45.599	380.153	55.689	58.813
68.478	127.514	127.379	113.756	49.625
78.104	388.97	363.556	67.041	28.506
93.667	176.183	405.32	220.483	197.78
87.609	303.042	181.687	113.638	132.201
117.222	204.233	140.161	95.106
intestinal matrix-HyPer7
wild type	dgk-2
0.719324	1.05237
0.958223	1.01123
0.890163	0.893219
0.989824	0.842167
0.834854	1.01333
0.81891	1.4674
0.981776	1.32669
1.04617	1.09672
1.32454	1.15613
1.37938	1.17783
0.995263	1.27557
1.15662	0.828288
0.691154	1.1969
0.864446	1.1925
1.08622	1.13289
1.04856	1.50073
1.08359	1.07056
1.23011	0.897913
0.952691	0.73495
0.94816	1.0746
intestinal OMM-HyPer7
wild type	dgk-2
1.09233	1.10591
1.04963	1.48193
0.927135	1.03809
1.35456	1.27169
0.57139	1.30343
0.562282	0.980367
1.37707	0.923154
1.01487	0.955377
1.43526	1.64048
0.555237	1.16132
1.02348	1.01252
1.13836	1.39413
1.20003	0.962065
0.742134	1.15435
0.843581	0.935897
0.859739	0.790395
1.24234	1.09166
1.71819	1.60009
0.695484	0.960207
0.596878	1.34152
intestinal FLP-2::Venus secretion
empty vector+juglone	aex-4+juglone	empty vector	aex-4
30.616	27.018	45.873	29.614
147.175	43.719	176.261	24.422
67.838	71.822	102.923	42.268
29.51	32.306	106.085	46.526
32.651	56.551	171.106	42.363
302.457	86.151	164.528	79.353
88.54	16.077	124.05	65.133
76.897	82.167	64.159	70.981
131.785	23.161	48.389	26.284
84.694	51.124	102.519	38.329
158.99	25.974	157.584	67.784
107.151	21.306	46.811	60.13
38.939	28.963	159.321	41.739
11.968	37.559	189.496	80.433
191.529	184.185	58.511	91.869
150.068	41.78	36.245	14.456
120.221	45.752	67.14	14.624
11.922	19.891	169.574	62.399
102.272	23.386	75.233	26.494
22.655	32.636	95.122	23.415
136.256	27.538	67.269	20.266
213.259	15.818	252.575	22.469
30.788	109.75	92.944	61.88
38.974	73.36	159.867	40.369
172.846		107.741	28.292
			23.656
			24.325
			18.286
			33.043
			28.187
